# Supplementary material
Source: Springer Nature journal article supplement (https://www.springermedizin.de/resource/supplementary/13051_2012_244_MOESM3_ESM.pdf/9670232)

Overall Cohort (n=96)

Definitive SBRT Subgroup (n=89)

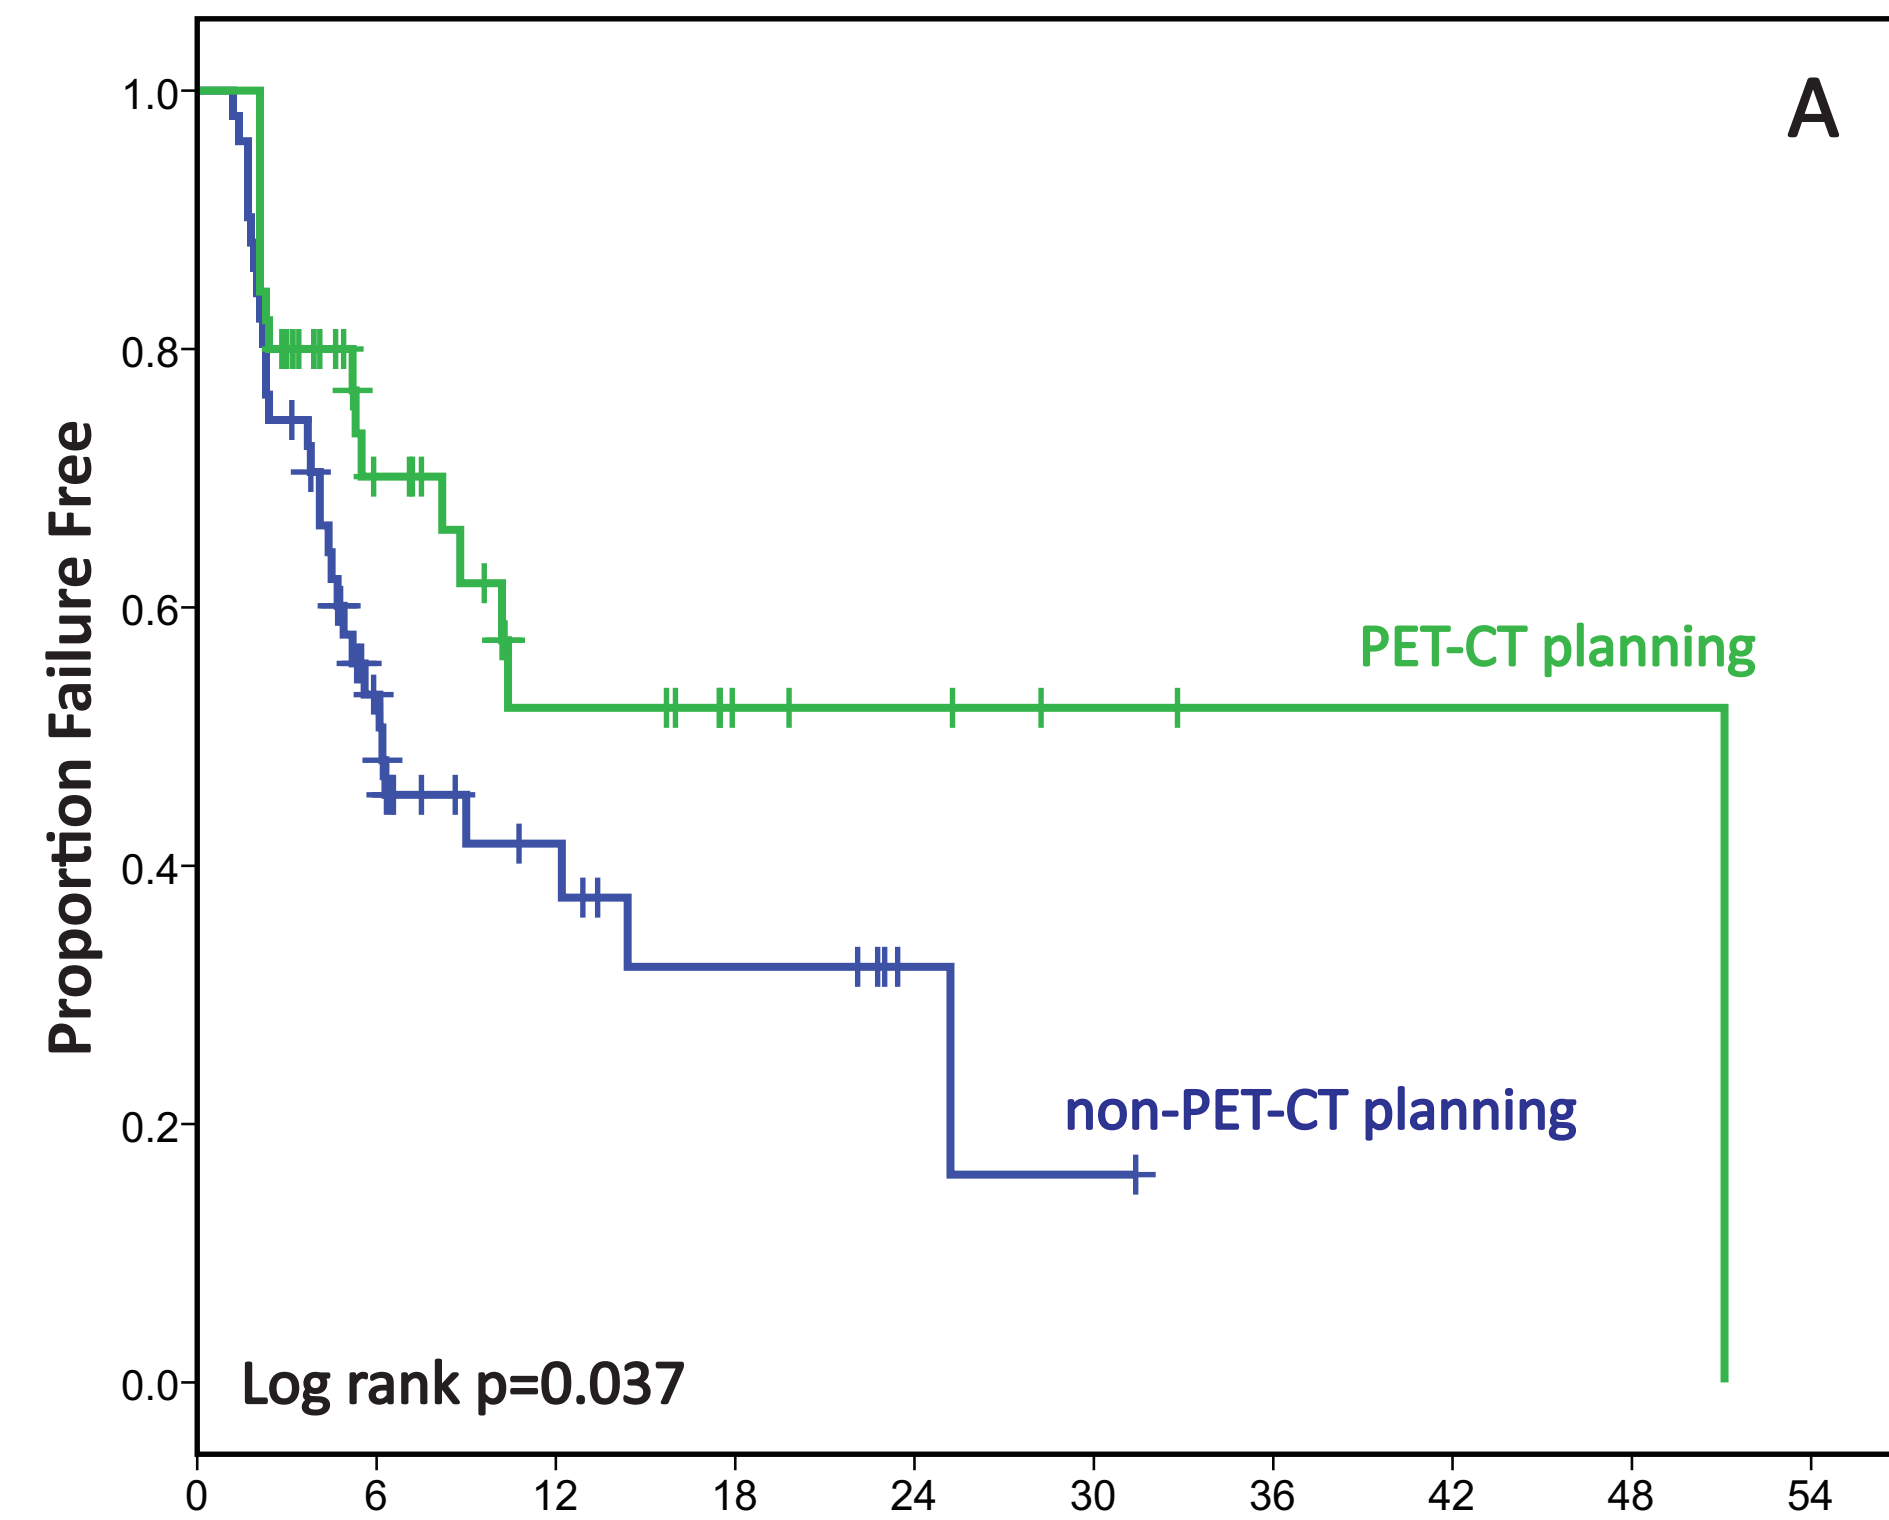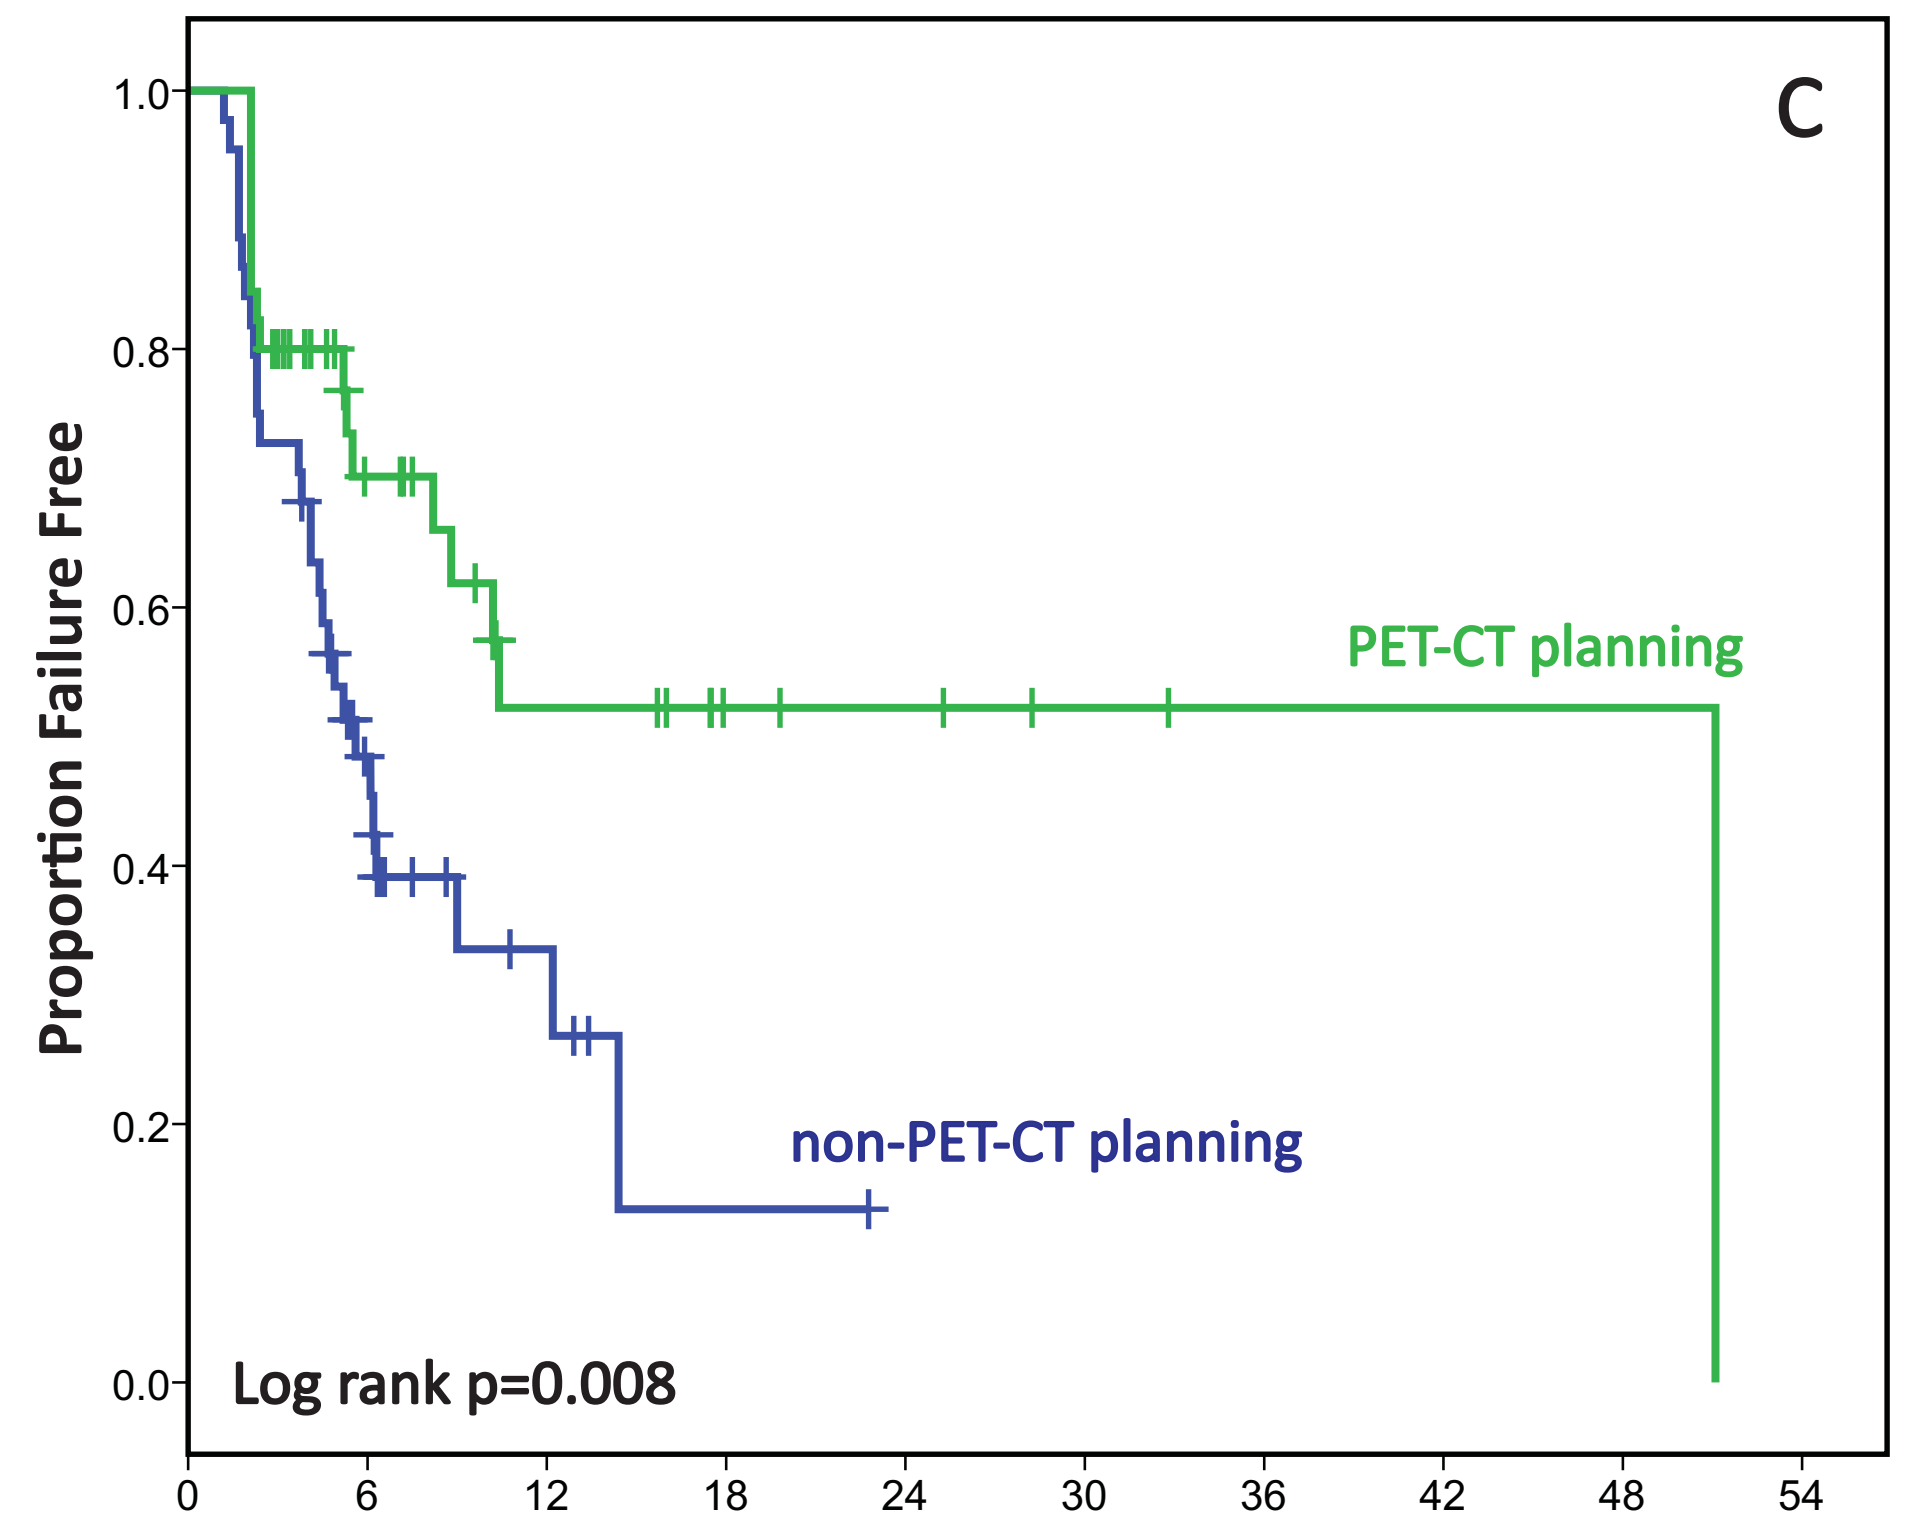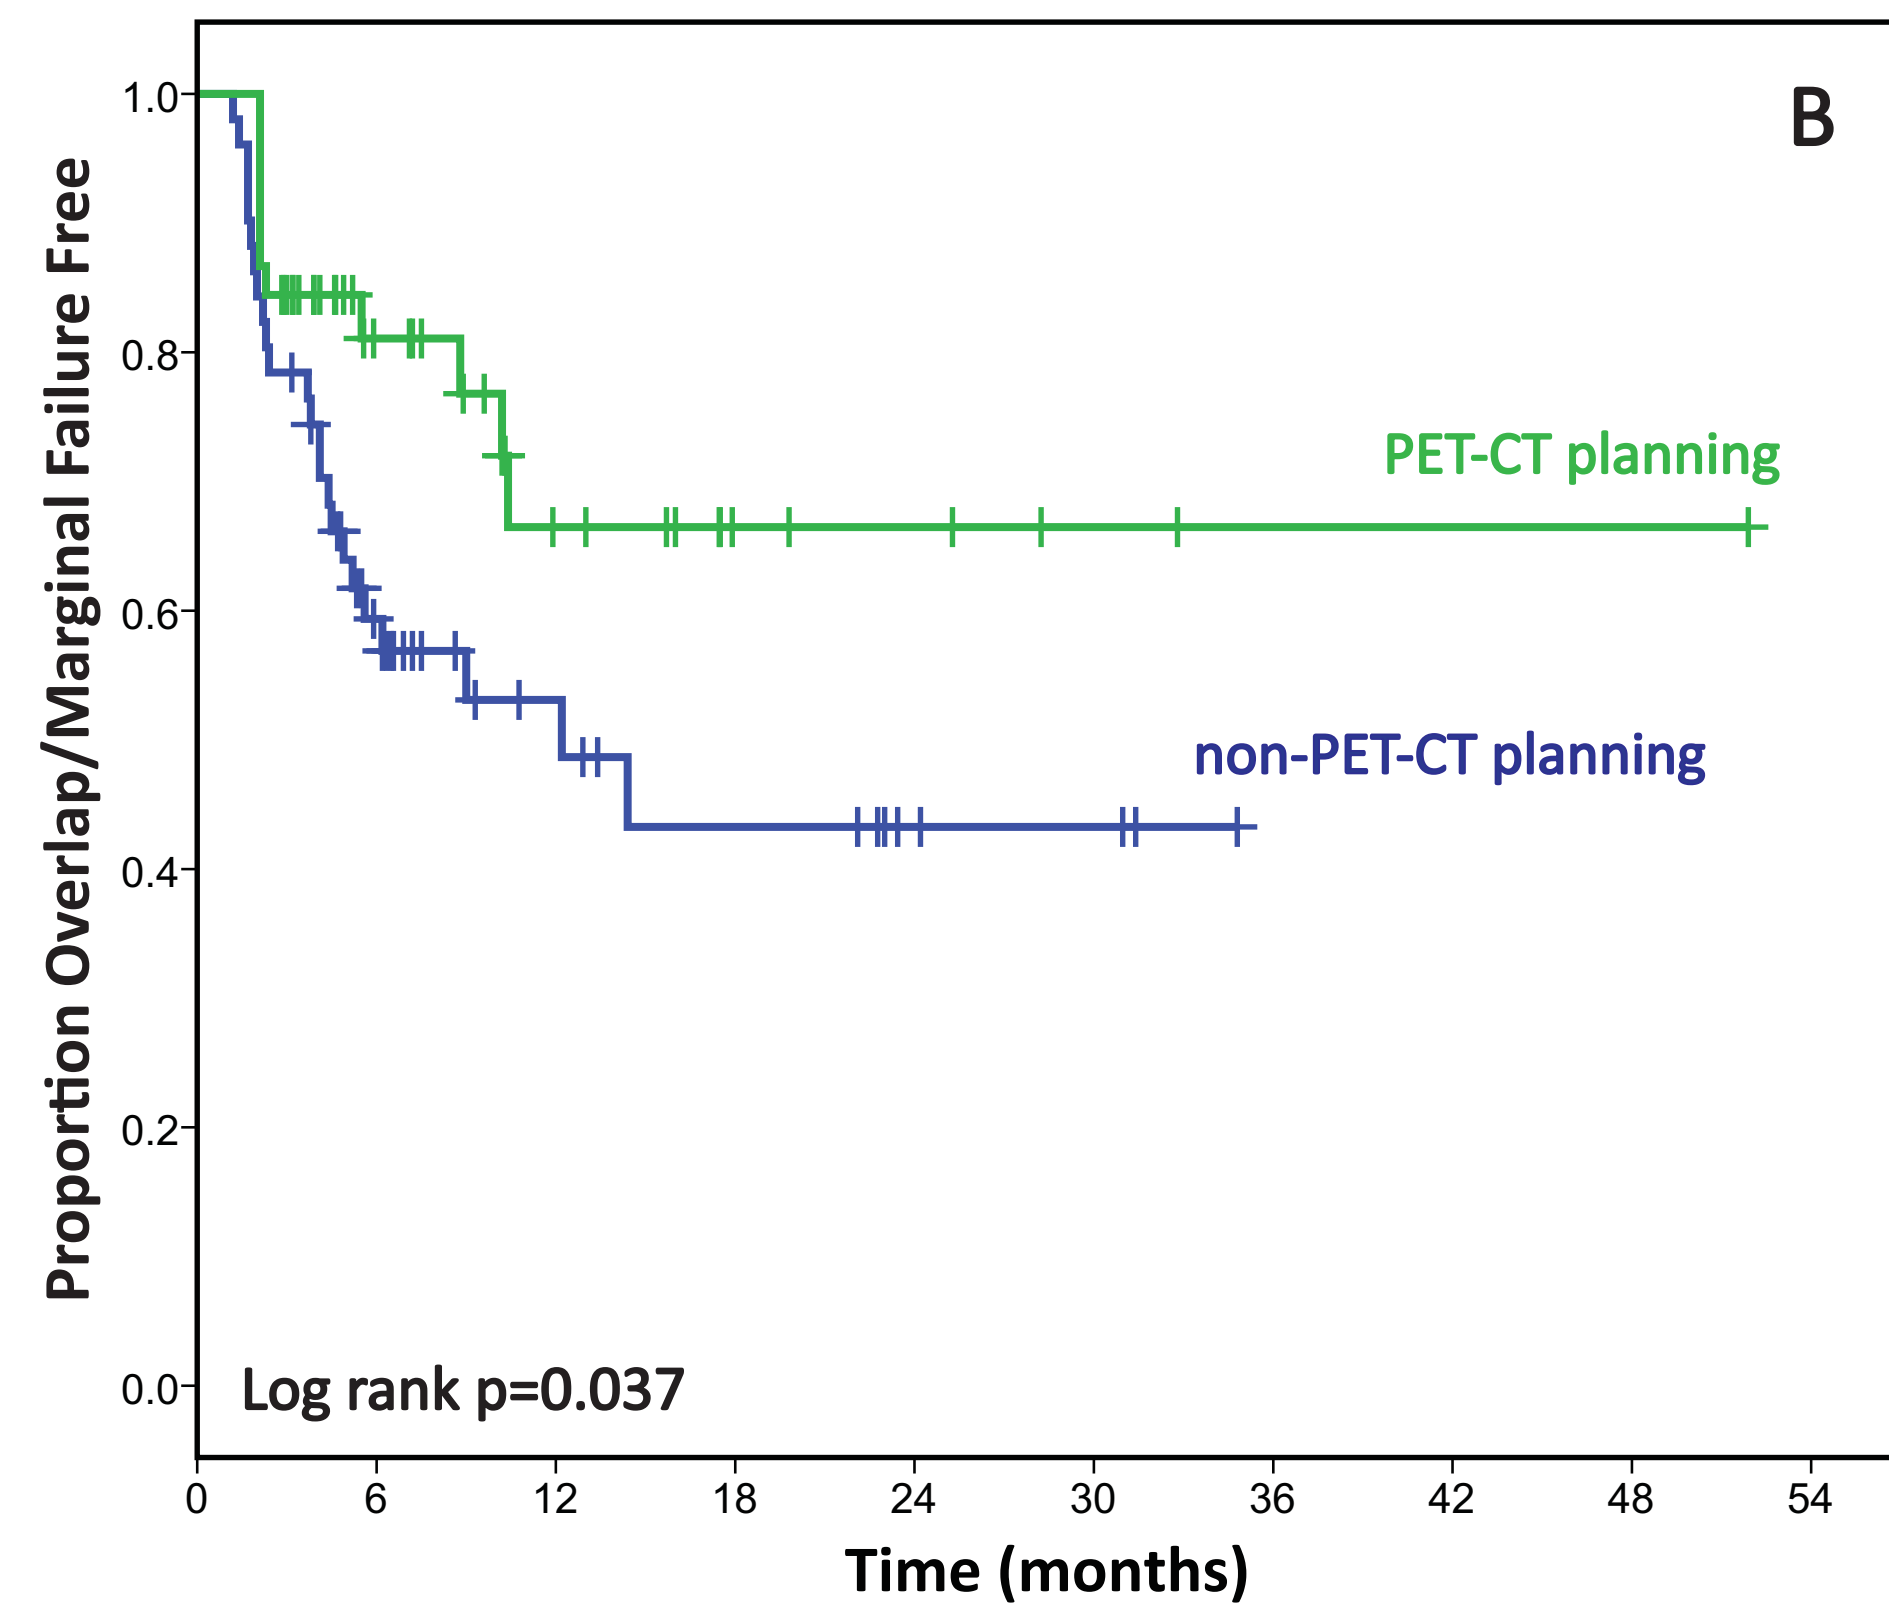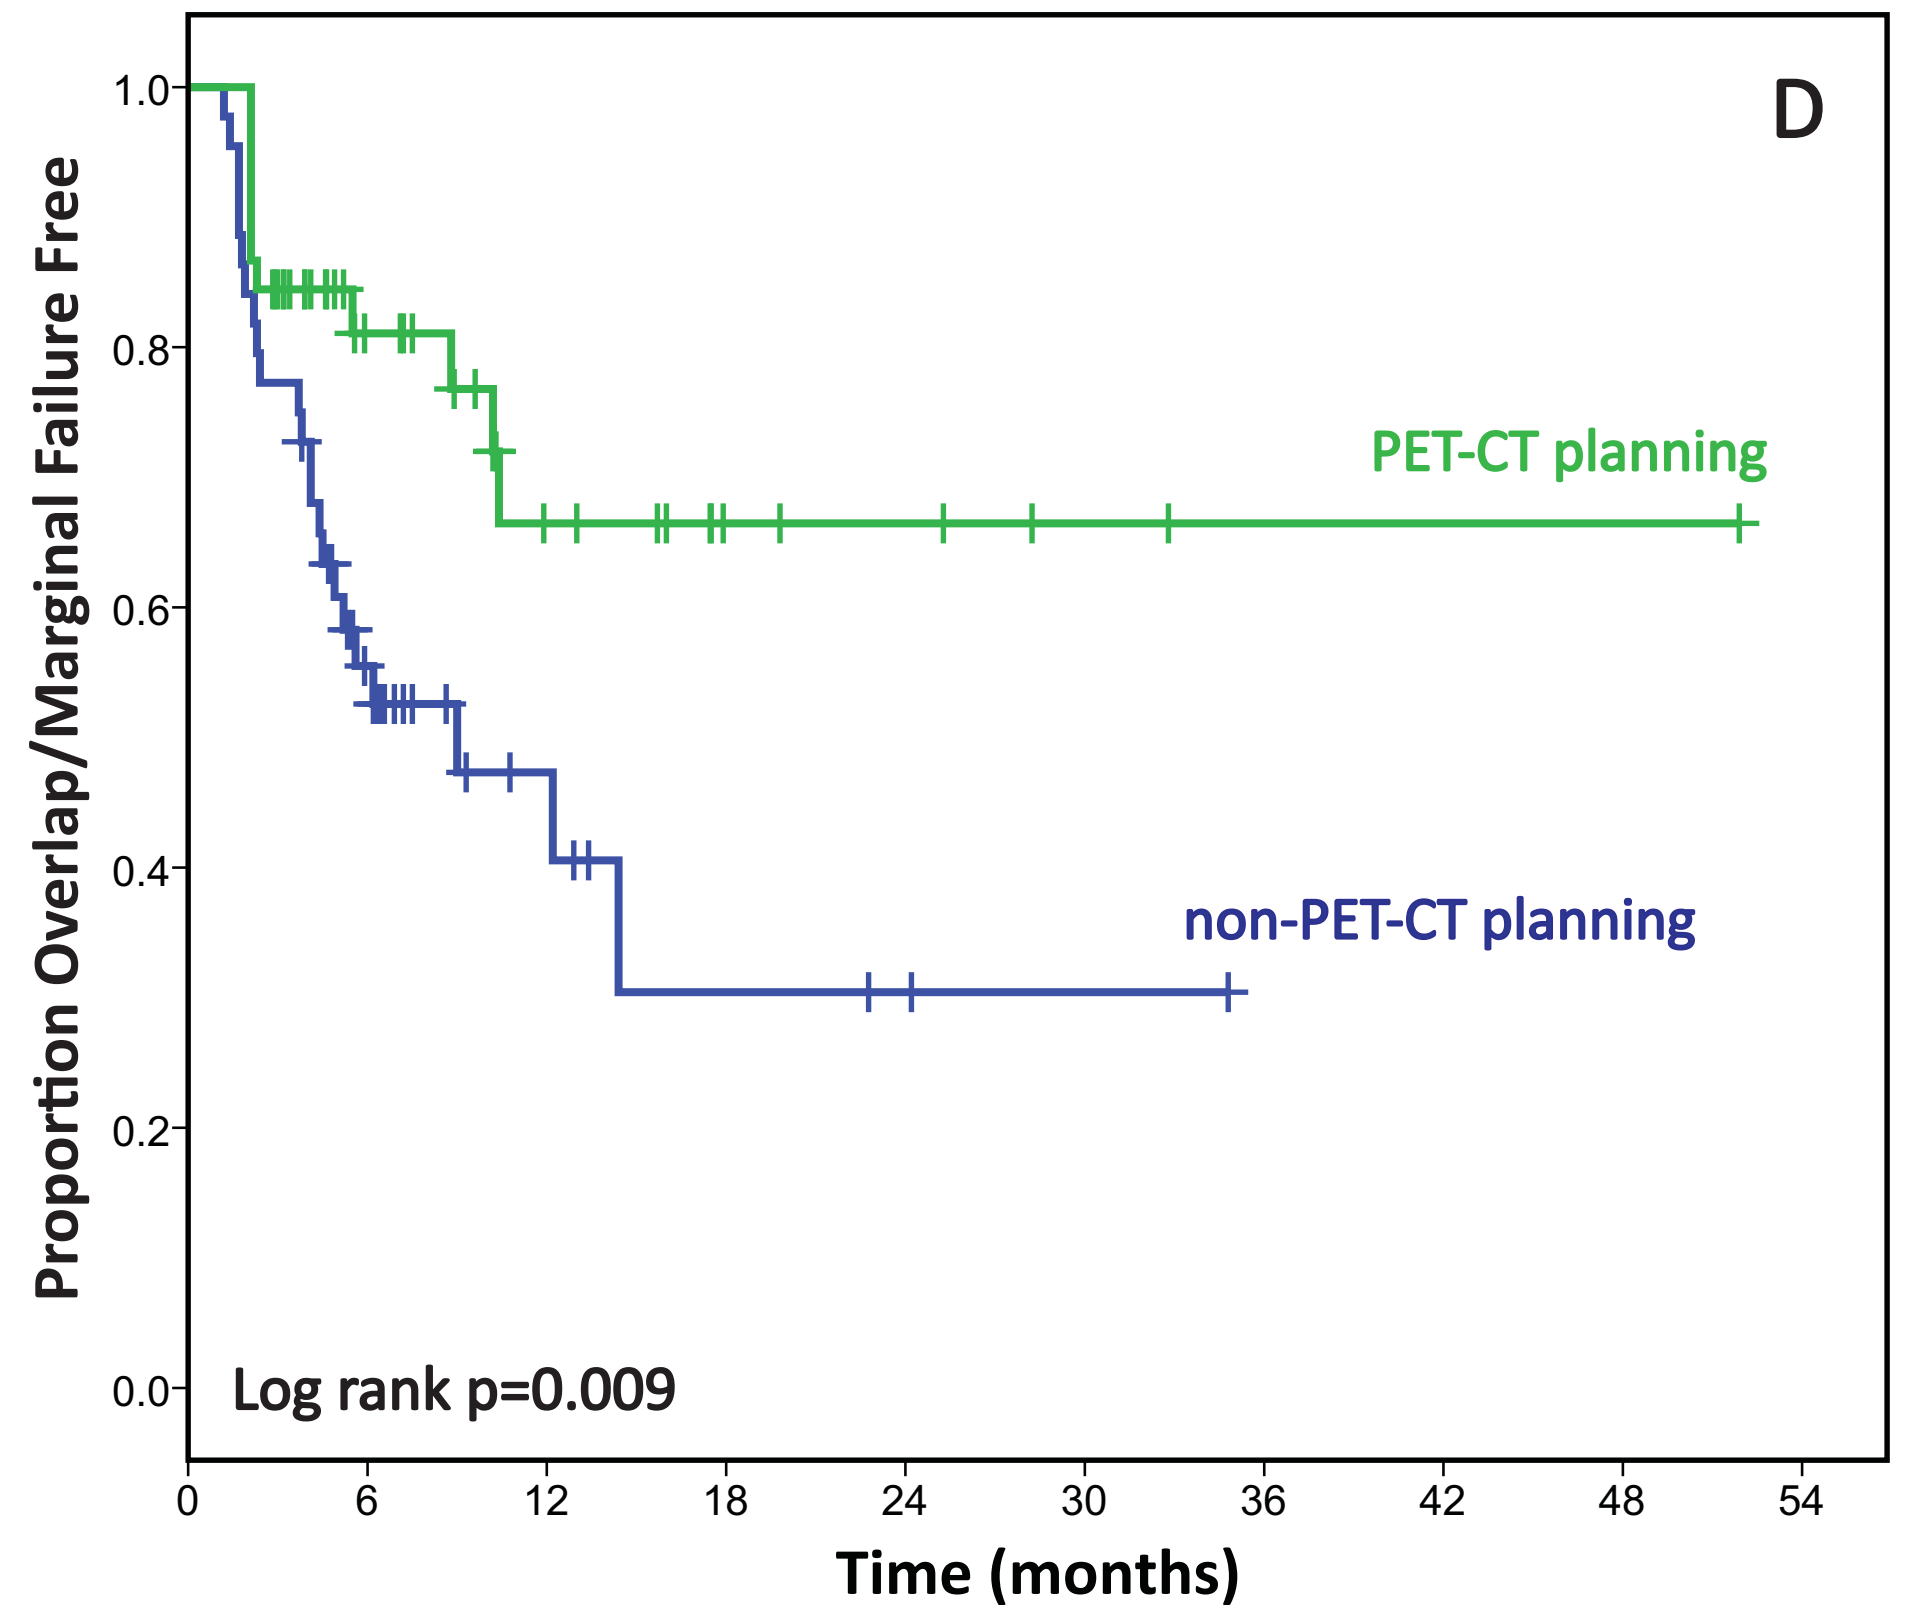

Supplement: MOESM3 [file 9670232]
